# Supplementary material for: Fabrication of organic–inorganic hybrid membranes composed of poly(vinylidene fluoride) and silver cyanamide and their high photocatalytic activity under visible light irradiation
Source: Royal Society of Chemistry journal article supplement (doi:10.1039/c6ra10434g), 2016-01-01
Supplement: c6ra10434g1.pdf [file c6ra10434g1.pdf]

## **Fabrication of organic-inorganic hybrid membranes composed of poly(vinylidene fluoride) and silver cyanamide and its higher photocatalytic activity under visible light irradiation**

Xinru Meng , Pin Yao , Yan Xu, Hao Meng, Xia Zhang\*

Department of Chemistry, College of Science, Northeastern university, shenyang 110819, China

E-mail: xzhang@mail.neu.edu.cn Tel: + 862483684533. Fax: +862483684533.

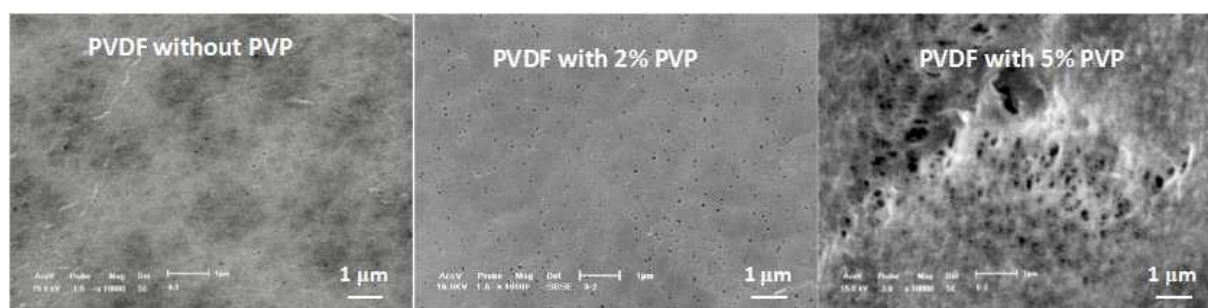

**Fig. S1** SEM images of PVDF membranes fabricated without using PVP and with 2 wt% and 5 wt% PVP.

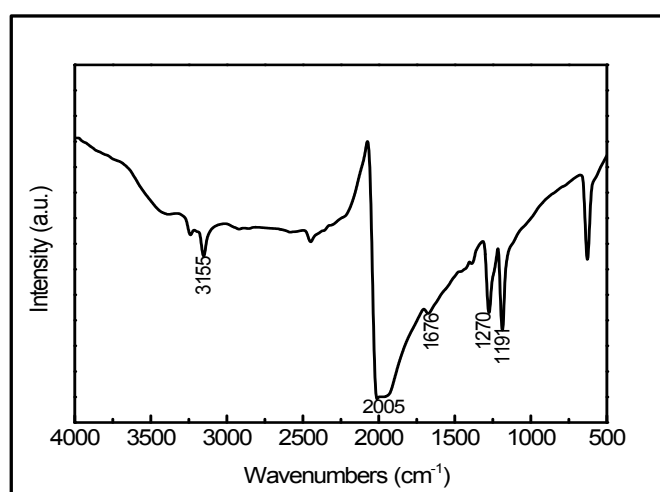

**Fig. S2** FT-IR spectrum of 2 wt% PVP decorated Ag<sub>2</sub>NCN particles.

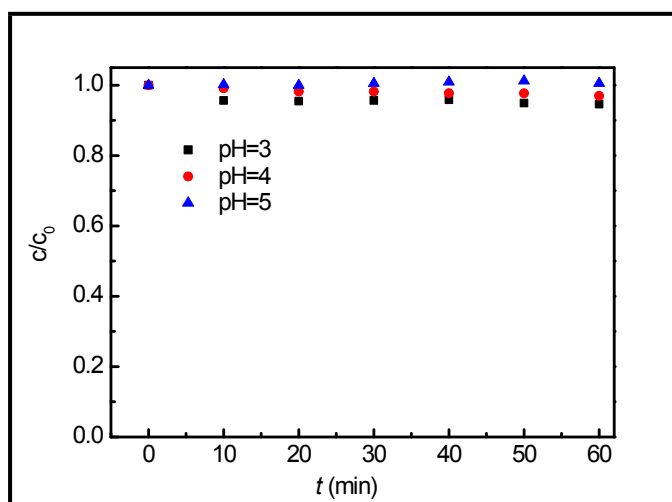

**Fig. S3** The concentration of Acid blue 1 versus irradiating time without adding photocatalysts
